# Supplementary material
Source: Springer Nature journal article supplement (https://www.springermedizin.de/resource/supplementary/13017_2013_292_MOESM1_ESM.pdf/9635876)

D3/61a

C

L

04/01/2003

350 / 40

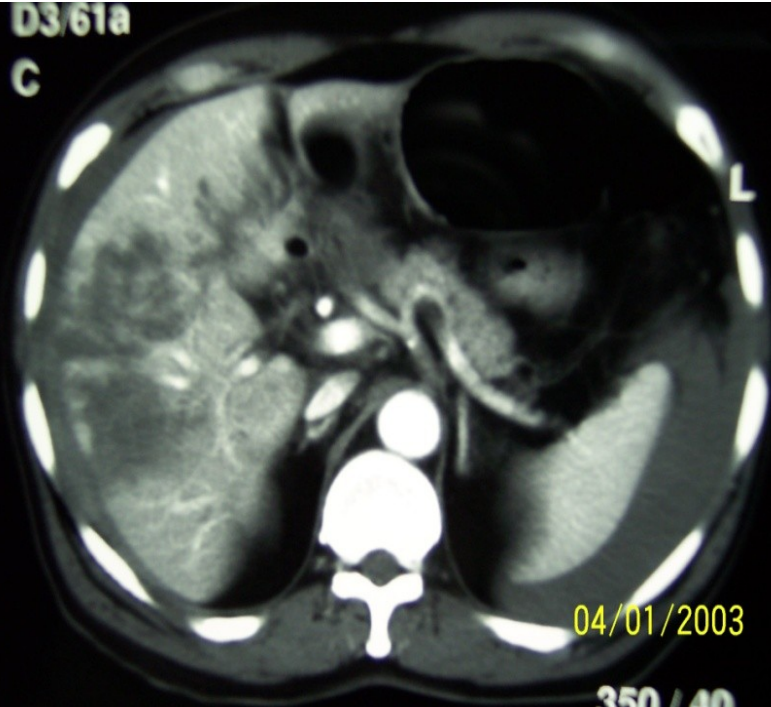

Supplement: MOESM1 [file 9635876]
